# Supplementary material for: Distinct colicin M-like bacteriocin-immunity pairs in Burkholderia
Source: PubMed Central journal article supplement (PMC4661593; doi:10.1038/srep17368), 2015-11-27
Supplement: srep17368-s1.pdf [file srep17368-s1.pdf]

# Distinct colicin M-like bacteriocin-immunity pairs in *Burkholderia*

## Supplementary information

Maarten G. K. Ghequire\*, René De Mot

Centre of Microbial and Plant Genetics, University of Leuven, 3001 Heverlee, Belgium

\* Author of correspondence: Maarten G. K. Ghequire

e-mail: maarten.ghequire@biw.kuleuven.be

Tel: +32 16 376638

Fax: +32 16 321963

**Fig. S1. Multiple sequence alignment of BurM proteins.** Abbreviations for species names: Bamb, *Burkholderia ambifaria*; Bcen, *Burkholderia cenocepacia*; Bcep, *Burkholderia cepacia*; Bcon, *Burkholderia contaminans*; Bglu, *Burkholderia glumae*; Bokl, *Burkholderia oklahomensis*; Bpyr, *Burkholderia pyrrocinia*; Bubo, *Burkholderia ubonensis*; Burk, *Burkholderia* sp. Different shading indicates the degree of conservation. Predicted Sec signal sequences are boxed in red and Tat signal sequences in orange, the conserved motif at the amino-terminus in purple (see Sequence alignment and logo in Fig. 2), the ColM domain in yellow, conserved residues in the catalytic domain in green. The aspartate residue that was mutated in BurM2 is marked with an asterisk.

Burk A1 MGNSNDNNKFKIRSLIGAIASAALGMSGMSKSLA-----IQPEITLAPITIVGSGNVI-----TSSPADLPR-----MGHPALPPPELMTN  
Bamb AMMD (BurM2) MRKRKSSSDHVAEQTORHRKRLMLVAASPYLITIAALKQSTSLA-----OTMVEEIEISVAAPRL-----PSL--DGFS-----NKVGGGGAMSEAA  
Bcep GG4 MRKSNGLERAHAAEQTORHKRLVLTGAVSFLYAKRKSICLA-----QAMVEEIEISVAAPRL-----PSL--DGFS-----NKVGGGGAMSEAA  
Burk A9 MRKSNGLERAHAAEQTORHKRLVLTGAVSFLYAKRKSICLA-----QAMVEEIEISVAAPRL-----PSL--DGFS-----NKVGGGGAMSEAA  
Bubo Bu MKKRD TLVSA NV MNDNKRHONRKRFLIASTALDELGTLLKHTTSAVA-----QSVMVEEIEISVAAPRL-----PDFNFGDFK-----INSNEIPGANIGA  
Bpyr CH-67 MTRDRDSSAPENIERIAQTRHRERLRFVASSIVLLELIALKHSITCSA-----QSVMVEEIEISVAAPRL-----PSL--DGFS-----GKVGGGGAMSEAS  
Bamb MC40-6 MTERNPWKQTSPTS EGKQRLVLRFLVAASALIFSGMLKHA TAM A-----QNMVEEIEISVAAPRL-----PDFNFGDFG-----VNI NGGIPGANPGT  
Bcep ATCC 25416 MKRNP LKNTNHAS EEKQOPLMRFLIFASTALIFSGTLLKHA TAM A-----QSVMVEEIEISVAAPRL-----PDFNFGDFD-----IKANEIPGANPGA  
Bcon LMG 23361 MTRNP LKHVTRPS EENQOPLMRFLIFASTALIFSGTLLKHA TAM A-----QSVMVEEIEISVAAPRL-----PDFNFGDFG-----IKVNEIPGANPGA  
Bglu PG1 MINFH EEPNSRLSTRKAFIKNSGLLELIALMLNPKKSWG-----DINVEEIEISVAAPRL-----PDFNFGDFD-----LLTA  
Bamb MEX-5 (BurM1) MIKKLSKYERVVDNTRTRKAVIRASGAVIELLGLSSKSLA-----APPDFMVEEIEISVAAPRL-----TDMYYPGSGTGLTGLPSPRIPSVLNG  
Bcep DWS 37UF10B-2 MKRNFIFGASTAL-----LASSP IRLA-----OGHGPA DMLMVEEIEISVAAPRL-----LSLP IATPN-----GPAGGYHWAINGD  
Bcen CEIB S5-1 MKRNFIFGASTAF-----LMSNPVRLA-----OGHGPA DMLMVEEIEISVAAPRL-----LALP IATPN-----GPAGGYHWAINGD  
Bcep DWS 16B-4 MKRNFIFGASTAF-----LMSNPVRLA-----OGHGPA DMLMVEEIEISVAAPRL-----LALP IATPN-----GPAGGYHWAINGD  
Boki C6786 MEEKFRHS ISNRDRV MHVSKRSLIRTSIAFSAAMLPSVR IWAOTKGHGPA-----MVEEIEISVAAPRL-----TNLPVPSVG-----GPVGSYWTAGFD  
Boki EO147 MEEKLRHS ISNRDRV MHVSKRSLIRTSIAFSAAMLPSVR IWAOTKGHGPA-----MVEEIEISVAAPRL-----TNLPVPSVG-----GPVGSYWTAGFD

Burk A1 SGTTP ILLGLK VYLINGLN LGAAISQDITIGTLTALAQGI--VNASDMVLRADGTYASHS WIG IGE GKKNIA GATP YGLT--LNOSNI MSLFGVYAAOYYP  
Bamb AMMD (BurM2) LGYPKLLC FGRV--CSA TEMFNNDH GDMISVTEEFKFI--FEHRNEI FWRN OTLIGEHGHWARG--CYONFP GANS YNLNVA LAOHGD VSTLFGVYANOLNG  
Bcep GG4 LGYPKLLC FGRV--CSA TEMFNNDH GDMISVTEEFKFI--FEHRNEI FWRN OTLIGEHGHWARG--CYONFP GANS YNLNVA LAOHGD VSTLFGVYANOLNG  
Burk A9 LGYPKLLC FGRV--CSA TEMFNNDH GDMISVTEEFKFI--FEHRNEI FWRN OTLIGEHGHWARG--CYONFP GANS YNLNVA LAOHGD VSTLFGVYANOLNG  
Bubo Bu GIPPPSVC FNQY--CASNYMLL PANTNMVRA TEMFRYI PA IGRNDT FWRN OTLIGEHGHWARG--CYKYLP GANQYGFN FEPGOYAN MSLFGVYANOLNG  
Bpyr CH-67 LGYPKLLC FGRV--CSA TEMFNNDH GDMISVTEEFKFI--FEHRNEI FWRN OTLIGEHGHWARG--CYKHFP GANS YNLNVA LGH-AD VSTLFGVYANOLNG  
Bamb MC40-6 GTPAP TVCFN QY--C TS NFVLL PANTNMIRA TEMLKHIEI FGRNDT FWRN OTLIGEHGHWARG--CYKYLP GANQYGFN FEPGOYAN MSLFGVYANOLNG  
Bcep ATCC 25416 GMPAP S ICFN QY--C TS NFVLL PANTNMIRA TEMLKHIEI FGRNDT FWRN OTLIGEHGHWARG--CYKHFP GANQYGFN FEPGOYAN MSLFGVYANOLNG  
Bcon LMG 23361 GTPAP TVCFN QY--C TS NFVLL PANTNMVRA TEMLKHIEI FGRNDT FWRN OTLIGEHGHWARG--CYKHFP GANQYGFN FEPGOYAN MSLFGVYANOLNG  
Bglu PG1 GITAP LLQVGNLWLVNGAKILLTAACMPD IOVLVAHAEGII--IQARDGARS AMLYGTHS WANG--CYKTV DITG P YGLT--ASN LGN MSLFGVYANOLNG  
Bamb MEX-5 (BurM1) NISGGPVLRVGEL YLVNGKILDEA AER GDS NGTVL EHA TGI--EHA TESAVRA AAVYGLV IHWATG--CYINQP GANQYFA FT--RVG S MSLFGVYANOLNG  
Bcep DWS 37UF10B-2 NIRGG IYQIGKRLVNGKILDEA AAR GSRDVL EHG YGM--ELASKOVV QADIS TYALHS WADM--GWOGIS GATQYGLS--DIT FSG MSLFGVYANOLNG  
Bcen CEIB S5-1 NIRGG IYQIGKRLVNGKILDEA AAR GSRDVL EHG YGM--ELASKOVV QADIS TYALHS WADM--GWOGIS GATQYGLS--DIT FSG MSLFGVYANOLNG  
Bcep DWS 16B-4 NIRGG IYQIGKRLVNGKILDEA AAR GSRDVL EHG YGM--ELASKOVV QADIS TYALHS WADM--GWODIT GATQYGLS--DIT FSG MSLFGVYANOLNG  
Boki C6786 NIRGG IYQIGKRLVNGKILDEA AAR GSRDVL EHG YGM--ELASNNLV KADIA TYGLHWANN--GWOS IV GADQYGLS--NTOPSG MSLFGVYANOLNG  
Boki EO147 NIRGG IYQIGKRLVNGKILDEA AAR GSRDVL EHG YGM--ELASNNLV KADIA TYGLHWANN--GWOS IV GADQYGLS--NTOPSG MSLFGVYANOLNG

Burk A1 GMFLQPSN E QFYGTALLTTS A IYWHYEDGS MRSNIE SMND M G IAD EDP H K RVALD LANSRGT Y I DA QED DNI FSHGDKDI VVAG I LERVIG R V F EDV I I  
Bamb AMMD (BurM2) ---IRVSE E QFYGN E F M F I G A V Y W W F E N G E R S N I E S M N I M G S A D E F K L I O D S I D N P G Y E P G T Y S I D G P E S N I F P N H G A H D F W S A H T V G R V S G H V R G T I T M O  
Bcep GG4 ---IRVSE E QFYGN E F M F I G A V Y W W F E N G E R S N I E S M N I M G V S D F E L I R S S I D N P G Y E P G T Y P I D G P E S N I F P N H G A O D F W S A H T V G R V S G H V R G T I T M O  
Burk A9 ---IPATSE E QFYGN E F M F I G A V Y W W F E N G E R S N I E S M N I M G V S D F E L I R S S I D N P G Y E P G T Y P I D G P E S N I F P N H G A O D F W S A H T V G R V S G H V R G T I T M O  
Bubo Bu ---TPPTS E QFYGN E L M F I G A V N H W H F G N G V O R S N I E S M N I M G V S D F E L I R A N I D N P G Y E P G T Y P I N S G P S N I F P N H G T O D L W S A H T V G R V S G H V R G T I T M O  
Bpyr CH-67 ---IRVSE E QFYGN E L M F I G A V N H W H F G N G V O R S N I E S M N I M G V S D F E L I R A S I D N P G Y E P G T Y P I D G P E S N I F P N H G A O D F W S A H T V G R V S G H V R G T I T M O  
Bamb MC40-6 ---LPATSE E QFYGN E L M F I G A V N H W H F G N G V O R S N I E S M N I M G S A D F E N I A K A N E N P G Y E P G T Y P I D T A S N I F P N H S H G T O D L W S A S V F G R V S G H V R G T I T M O  
Bcep ATCC 25416 ---IPATSE E QFYGN E L M F I G A V N H W H F G N G V O R S N I E S M N I M G V A D E R E I T K A N E N P G Y E P G T Y P I D T A S N I F P N H G T O D L W S A S T F G R V S G H V R G T I T M O  
Bcon LMG 23361 ---IPATSE E QFYGN E L M F I G A V N H W H F G N G V O R S N I E S M N I M G V A D E R E I T K A N E N P G Y E P G T Y P I D T A S N I F P N H G T O D L W S A S T F G R V S G H V R G T I T M O  
Bglu PG1 QG FYL E V S E E K F Y G S P F T T S A I Y W W F E D G S T H M N I N A V N I V N I D E F G P V P E I I R G N P D M S P G T Y P I D A E R S F N I F N H - A S N L W T A L V N G R V S G H V R G T I T M O  
Bamb MEX-5 (BurM1) NLP SR P A S E E A F Y G S P F M S H A I Y W W F E D G S P R M N I O S I N H A M S L S D P A Q I N R A V E N P A Y S H T Y P F D S E F S N I F D H H T K D L W A A G V I G R V S G H V R G T I T M O  
Bcep DWS 37UF10B-2 HLPAP P I E S E K F Y A T E F F T S A Y Y N W H R E N G D P K S V D I K S I R I E H G A Q O I S P I R D I H V N D A M E R G T Y R I D A E S N I L S --D O E L I V G S A L G R V S G H H O G E N F I G  
Bcen CEIB S5-1 HLPAP P I E S E K F Y A T E F F T S A Y Y N W H R E N G D P K S V D I K S I R I E H G V Q O I S P I R D I H V N D A M E R G T Y R I D A E S N I L S --N O E L I V G S A L G R V S G H H O G E N F I G  
Bcep DWS 16B-4 HLPAP P I E S E K F Y A T E F F T S A Y Y N W H R E N G D P K S V D I K S I R I E H G V Q O I S P I R D I H V N D A M E R G T Y R I D A E S N I L S --D O E L I V G S A L G R V S G H H O G E N F I G  
Boki C6786 HLP P T P I S E E Q F Y A T E F F T A A Y D W H R E N G S P R A V D I K S I R I E H G A N E I G P I R S I H V N D G M E R G A Y P I D A E S N I L S --D K E Y I V G S A L G R V S G H V G O I V I T  
Boki EO147 HLP P T P I S E E Q F Y A T E F F T A A Y D W H R E N G S P R A V D I K S I R I E H G A N E I G P I R S I H V N D G M E R G A Y P I D A E S N I L S --D K E Y I V G S A L G R V S G H V G O I V I T

Burk A1 T D T H Y S H N G Y W H Y D R Y A Y P S T - E G Y O E V L N N E M N I G A K - S H N D Y D H T E N K G V T I S G O R P N - K E Q A V S - P T G O N T R P S F C G L P R N P P Y I D  
Bamb AMMD (BurM2) Q D N H Y R E V S Y H N N P K A A D S N - E P F I O E W M M V I R E F I G S M L G H A D Y O H Y E T E K E I S F S G O R P V - R N A E T R - P P Q A V H R P S F C G L M R P G P Q  
Bcep GG4 E D N H Y R E A G S Y H N N P K A A D R S N - E P F I O E W M M V I R E F I G S T L G H T D Y O H Y E T E K E I S F S G O R P V - R N A E T R - P P Q A V H R P S F C G L M R P R L W  
Burk A9 E D N H Y R E A G S Y H N N P K A A D R S N - E P F I O E W M M V I R E F I G S T L G H T D Y O H Y E T E K E I S F S G O R P V - R N A E T R - P P Q A V H R P S F C G L M R P R L W  
Bubo Bu A D N H Y R E N G Y W H N P R A D P S N - E P F I O E A A H H F A K I G S V L G H T D Y O H Y E T E K E I S F S G O R P V - R N A E I R - P P Q A V H R P S F C G L M R P G R F  
Bpyr CH-67 E D N H Y R E V S Y H N N P K A A D R S N - E P F I O E W M M V I R E F I G S V L G H T D Y O H Y E T E K E I S F S G O R P V - R N A E T R - P P Q A V H R P S F C G L M R P R L R  
Bamb MC40-6 E D H Y R E D G S Y S N N P R A D P S N - E P F I O E T A M M F I A K I G A I L G H K D Y O H N E E K K I S F S G O R P V - K N A D I R - P P Q A V H R P S F C G L M R P P R  
Bcep ATCC 25416 E D D H Y R E D G Y S N N P R A D P S N - E P F I O E A A H H F I A K I G A I L G R K D Y O H N E E K K I S F S G O R P V - K N A G T R - P P Q A V H R P S F C G L M R P L R  
Bcon LMG 23361 E D D H Y R E D G Y S N N P R A D P S N - E P F I O E A A H H F I A K I G S I L G H K D Y O H N E E K K I S F S G O R P V - K N A G V H - P P Q A V H R P S F C G L M R P P R  
Bglu PG1 G D E S Y A H N G E W H N N P R A Y P S N - A T E T O E V L H S F I S R I G S L - G H V D Y D H I L E T S K E V N L S G R P R P S - - K F F A S - P G A - - - R R S T C G L F E N R N V V N Y  
Bamb MEX-5 (BurM1) D K G D Y R E A G S H H N N P R A Y D S N - A T L T O E V L I K F I G L I G T F - G H K D Y D H I L E T S Q N I T F S G K R P S A N O M P V N - P G E A V H R P S F C G R P P S G T  
Bcep DWS 37UF10B-2 S D D S H Y R E G E W H N P K A A D S R S - P S H O B A L H H F V R K I G E F T D H K D E M I Y E T E S O P I N N I N G T R A S I K A T N P D G T P A A H H T A R P C G F G R R P  
Bcen CEIB S5-1 S D D S H Y R E G E W H N P K A A D S R S - P S H O B A L H H F V R K I G E F T D H K D E M I Y E T E S O P I N N I N G T R A S I K A T N P D G T P A A H H T A R P C G F G R R P  
Bcep DWS 16B-4 S D D S H Y R E G E W H N P K A A D S R S - P S H O B A L H H F V R K I G E F T D H K D E M I Y E T E S O P I N N I N G T R A S I K A T N P D G T P A A H H T A R P C G F G R R P  
Boki C6786 A D G G S H S S E C W H N N P K A A D S N S - P Y I H O E M L H M L V R K M G E I T G H T D E M I Y E K E S O P I N N I S G S R R N I K A M D E R - - - G I V H R P S M C G L P H L G M R D I I N G N V S G L I  
Boki EO147 A D G G S H S S E C W H N N P K A A D S N S - P Y I H O E M L H M L V R K M G E I T G H T D E M I Y E K E S O P I N N I S G S R R N I K A M D E R - - - G I V H R P S M C G L P H L G M R D I I N G N V S G L I

\*

**Fig. S2. Purification of BurM proteins.** SDS PAGE electrophoresis of purified BurM1 (lane 2), BurM2 (lane 3) and BurM2(D297A) (lane 4). Kaleidoscope ladder with size marks (kDa) is visible in line 1.

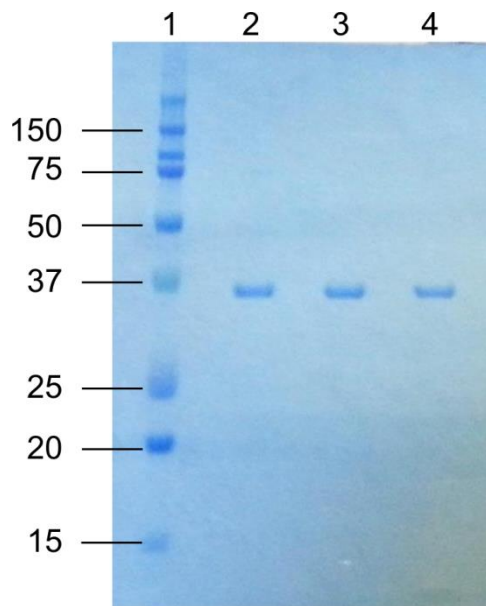

**Fig. S3. Homology and phylogeny of BmiA proteins.** Multiple sequence alignment (A) and unrooted maximum likelihood phylogenetic tree (B) of BmiA proteins. Encoded proteins without associated toxin (orphans) are marked with (o). Abbreviations for species names: Bpse, *Burkholderia pseudomallei*; Btha, *Burkholderia thailandensis*; other abbreviations as in Fig. S1. (A) Predicted transmembrane regions are boxed in blue and the conserved cysteine residue is colored green. Different grey shading indicates the degree of conservation. (B) Scale bar represents 0.3 substitutions per site. Bootstrap values (percentages of 1000 replicates) are shown at the branches.

**A**

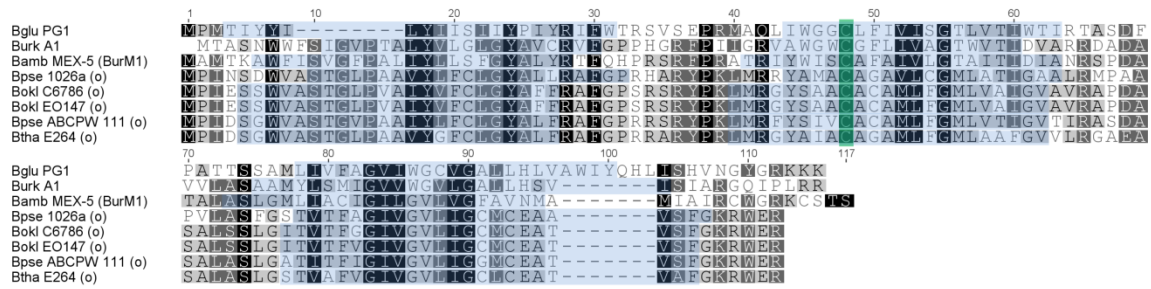

**B**

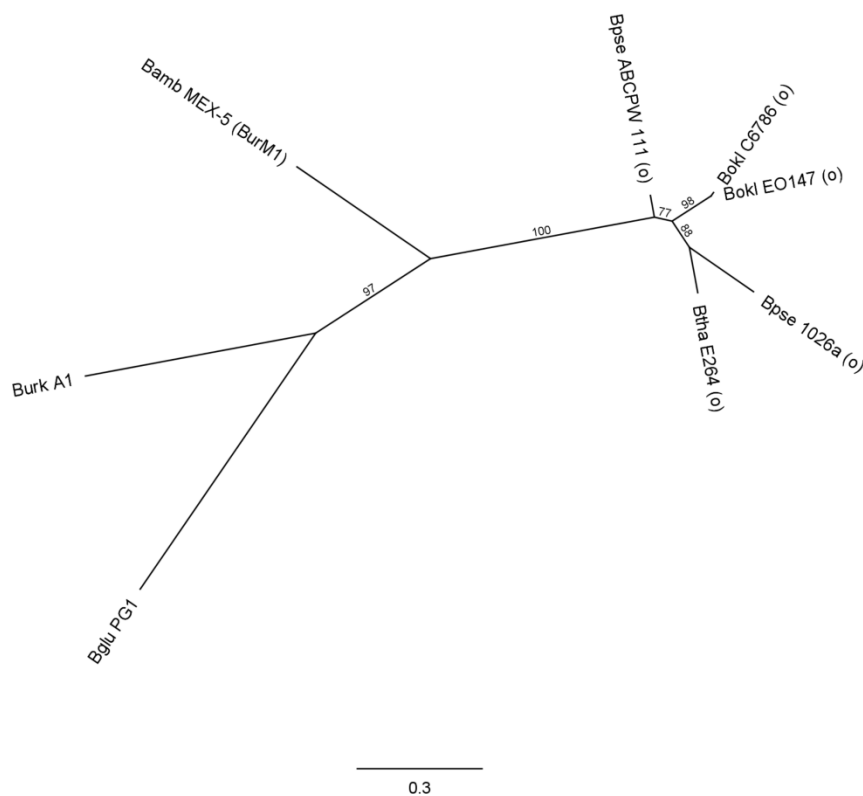



**Fig. S4. Homology and phylogeny of BmiB proteins.** Multiple sequence alignment (A) and unrooted maximum likelihood phylogenetic tree (B) of BmiB proteins. Encoded proteins without associated toxin (orphans) are marked with (o). Abbreviations for species names: Bmul, *Burkholderia multivorans*; other abbreviations as in Fig. S1. (A) Predicted transmembrane regions are boxed in blue, and predicted Sec-dependent signal peptide sequences in red. The conserved cysteine residues are highlighted in green boxes. Different shading indicates a different degree of conservation. (B) Scale bar represents 0.4 substitutions per site. Bootstrap values (percentages of 1000 replicates) are shown at the branches.

**A**

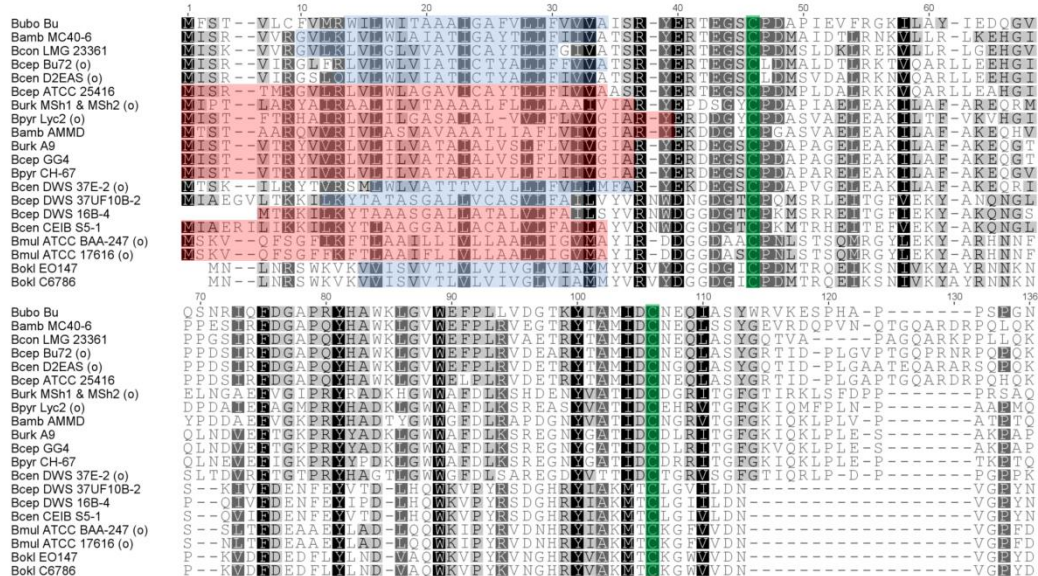

**B**

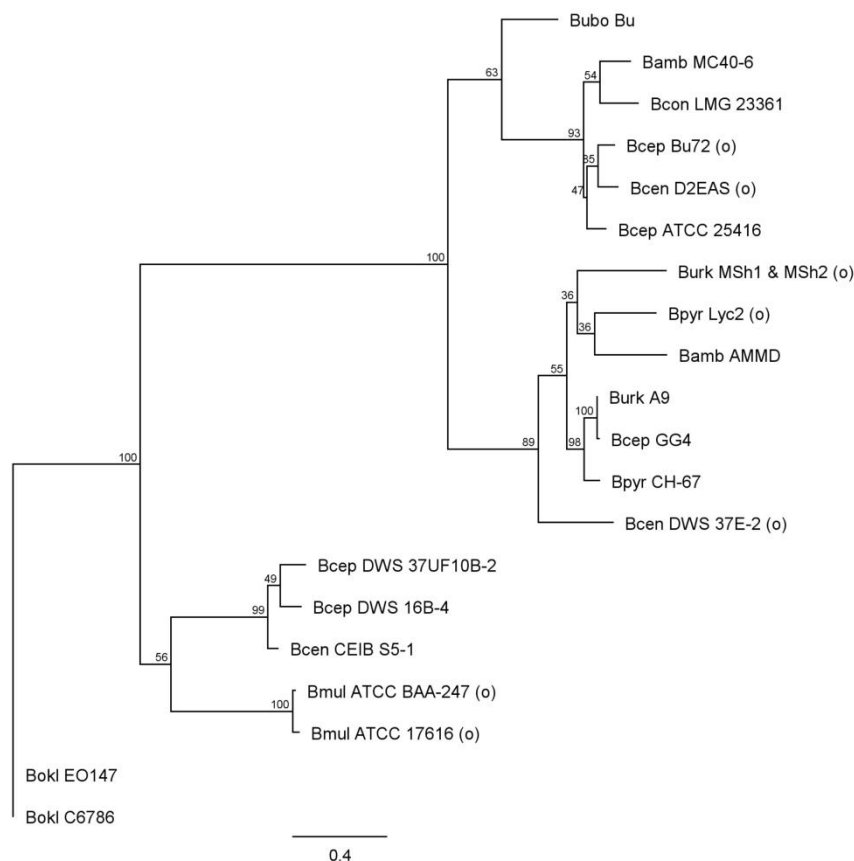

**Table S1. Susceptibility patterns of *Burkholderia* strains to BurM1 and BurM2.** +, clear halo; T, turbid halo: reduced cell density compared to cell lawn; -, no growth inhibition of the indicator strain; /, not informative.

| Species                | Strain number        | BurM1    | BurM2 |
|------------------------|----------------------|----------|-------|
| <i>B. ambifaria</i>    | LMG 17828            | -        | -     |
|                        | LMG 17829            | -        | -     |
|                        | LMG 19182 (or AMMD)  | -        | /     |
|                        | LMG 19466            | -        | -     |
|                        | LMG 19467            | -        | -     |
|                        | LMG 26702 (or MEX-5) | /        | -     |
| <i>B. anthina</i>      | LMG 20980            | -        | -     |
|                        | LMG 20983            | -        | -     |
| <i>B. arboris</i>      | LMG 24066            | -        | -     |
| <i>B. cenocepacia</i>  | LMG 6986             | -        | -     |
|                        | LMG 16656            | -        | -     |
|                        | LMG 16659            | +        | -     |
|                        | LMG 18826            | -        | -     |
|                        | LMG 18827            | -        | -     |
|                        | LMG 18828            | -        | -     |
|                        | LMG 18829            | +        | +     |
|                        | LMG 18830            | +        | -     |
|                        | LMG 18863            | -        | -     |
|                        | LMG 19230            | -        | -     |
|                        | LMG 21461            | +        | -     |
|                        | LMG 21462            | +        | -     |
|                        | LMG 24506            | -        | -     |
|                        | <i>B. cepacia</i>    | LMG 1222 | -     |
| LMG 18821              |                      | -        | -     |
| <i>B. contaminans</i>  | LMG 16227            | +        | -     |
| <i>B. diffusa</i>      | LMG 24065            | -        | -     |
|                        | LMG 24266            | -        | -     |
| <i>B. dolosa</i>       | LMG 18941            | +        | T     |
|                        | LMG 18943            | +        | T     |
| <i>B. lata</i>         | LMG 6992             | -        | -     |
| <i>B. latens</i>       | LMG 24064            | -        | -     |
| <i>B. metallica</i>    | LMG 24068            | T        | -     |
| <i>B. multivorans</i>  | LMG 13010            | -        | -     |
|                        | LMG 18825            | -        | -     |
| <i>B. pyrrocinia</i>   | LMG 14191            | T        | -     |
|                        | LMG 21824            | -        | -     |
| <i>B. seminalis</i>    | LMG 24067            | +        | -     |
|                        | LMG 24272            | -        | -     |
| <i>B. stabilis</i>     | LMG 14086            | -        | -     |
|                        | LMG 14294            | -        | -     |
| <i>B. ubonensis</i>    | LMG 20358            | -        | -     |
|                        | LMG 24263            | -        | -     |
| <i>B. vietnamensis</i> | LMG 10929            | -        | -     |
|                        | LMG 18835            | -        | -     |

**Table S2. List of primers and plasmids used in this study.**

| Primer/plasmid | Sequence <sup>a</sup> /characteristics                                                                                       | Purpose of use/origin                          |
|----------------|------------------------------------------------------------------------------------------------------------------------------|------------------------------------------------|
| PGPRB-8001     | AAGTTGGGTAACGCCAGGGT                                                                                                         | Sequencing of inserts in pUC18                 |
| PGPRB-8002     | GCACCCCAGGCTTTACACTTT                                                                                                        | Sequencing of inserts in pUC18                 |
| PGPRB-8461     | GCTCACTCATTAGGCACCC                                                                                                          | Sequencing of inserts in pJB3Tc20              |
| PGPRB-10029    | TGGCAGCAGCCAACCTCAGCTT                                                                                                       | Sequencing of inserts in pET28(a)              |
| PGPRB-10030    | TATAGGCGCCAGCAACCGCA                                                                                                         | Sequencing of inserts in pET28(a)              |
| PGPRB-10070    | TGGCTACT <b>CGAGT</b> GTCCCGCTAGGACGCGGAC                                                                                    | Cloning of <i>burM1</i> in pET28(a)            |
| PGPRB-10072    | TGGCT <b>ACCATGGG</b> ACCTCCTGATCCTATGTTGCCCGT                                                                               | Cloning of <i>burM1</i> in pET28(a)            |
| PGPRB-10077    | TGGCTACT <b>CGAGT</b> TGGGGTCCGGGGCGCATAA                                                                                    | Cloning of <i>burM2</i> in pET28(a)            |
| PGPRB-10080    | TGGCT <b>ACCATGGG</b> AACCAATGTGTTGCCGGAAATTTT                                                                               | Cloning of <i>burM2</i> in pET28(a)            |
| PGPRB-10117    | GAGATGTTCAATAACGCTGACCACGGCGACATGATCTC<br>CACCACGGA                                                                          | Removal of internal NcoI site in <i>burM2</i>  |
| PGPRB-10118    | TCCGTGGTGGAGATCATGTCGCCGTGGTCAGCGTTATTG<br>AACATCTC                                                                          | Removal of internal NcoI site in <i>burM2</i>  |
| PGPRB-10141    | TGGCT <b>AGCATGCC</b> CAGTAGACTGCGATCAGTGTC                                                                                  | Cloning of <i>bmiB</i> in pJB3Tc20             |
| PGPRB-10142    | TGGCT <b>AGGATCCCC</b> CTGTGAGCGGAGTCATT                                                                                     | Cloning of <i>bmiB</i> in pJB3Tc20             |
| PGPRB-10167    | TGGCTACT <b>GCAGT</b> ATTTGACAGCGAAGGAGATGCAAAA<br>TGA                                                                       | Cloning of <i>burM2</i> in pUC18               |
| PGPRB-10168    | TGGCTAT <b>CTAGA</b> ACAGGGCCAATGTGACTGA                                                                                     | Cloning of <i>burM2</i> in pUC18               |
| PGPRB-10179    | TCCTACACGTTGAATCCAGCCAAATTCGACGCCGATAGC                                                                                      | Construction of a D297A mutant in <i>burM2</i> |
| PGPRB-10180    | GCTATCGGCGTCAATTTGGCTGGATTCAACGTGTAGGA                                                                                       | Construction of a D297A mutant in <i>burM2</i> |
| PGPRB-10214    | TGGCTACT <b>GCAGAT</b> GGATATTCGATCCCCAGGGGA                                                                                 | Cloning of <i>bmiA</i> in pJB3Tc20             |
| PGPRB-10215    | TGGCTAT <b>CTAGAT</b> TGGGTGGACGTCGTAGAGGAA                                                                                  | Cloning of <i>bmiA</i> in pJB3Tc20             |
| pET28(a)       | pBR322 origin, His-tag/thrombin/T7 tag ; Km <sup>R</sup>                                                                     | Novagen                                        |
| pJB3Tc20       | Broad-host-range cloning vector; Ap <sup>R</sup> , Tc <sup>R</sup>                                                           | 1                                              |
| pUC18          | ColE1 replicon, <i>lacZ</i> , cloning vector; Ap <sup>R</sup>                                                                | 2                                              |
| pCMPG6228      | pET28(a) with 1013-bp PCR-amplified fragment containing BamMEX5DRAFT_6664 from <i>B. ambifaria</i> MEX-5 cloned in NcoI/XhoI | This study                                     |
| pCMPG6229      | pET28(a) with 983-bp PCR-amplified fragment containing BAMB_RS01670 from <i>B. ambifaria</i> AMMD cloned in NcoI/XhoI        | This study                                     |
| pCMPG6230      | Mutant construct of pCMPG6229; D297A of the encoded BmiB                                                                     | This study                                     |
| pCMPG6231      | pJB3Tc20 with 411-bp PCR-amplified fragment containing BamMEX5DRAFT_6663 from <i>B. ambifaria</i> MEX-5 cloned in PstI/XbaI  | This study                                     |
| pCMPG6232      | pJB3Tc20 with 447-bp PCR-amplified fragment containing BAMB_RS01665 from <i>B. ambifaria</i> AMMD cloned in SphI/BamHI       | This study                                     |

<sup>a</sup> Restriction sites incorporated in the primers are shown in bold: GGATCC, BamHI; CCATGG, NcoI; CTGCAG, PstI; GCATGC, SphI; TCTAGA, XbaI; CTCGAG, XhoI.

## References

- 1 Blatny, J. M., Brautaset, T., Winther-Larsen, H. C., Haugan, K. & Valla, S. Construction and use of a versatile set of broad-host-range cloning and expression vectors based on the RK2 replicon. *Appl. Environ. Microbiol.* **63**, 370-379 (1997).
- 2 Yanisch-Perron, C., Vieira, J. & Messing, J. Improved M13 phage cloning vectors and host strains: nucleotide sequences of the M13mp18 and pUC19 vectors. *Gene* **33**, 103-119 (1985).
